# Supplementary material
Source: PubMed Central journal article supplement (PMC5571336)
Supplement: AAC.00472-17_zac009176457s1.pdf [file AAC.00472-17_zac009176457s1.pdf]

1 **SUPPLEMENTAL TABLE S1.** Regional distribution of 51,352 clinical isolates of  
 2 *Enterobacteriaceae* collected worldwide from 2012 to 2015

3

| <b>Organism</b>                         | <b>Asia/<br/>South Pacific</b> | <b>Europe</b> | <b>Latin<br/>America</b> | <b>Middle<br/>East/<br/>Africa</b> | <b>North<br/>America</b> | <b>Total</b> |
|-----------------------------------------|--------------------------------|---------------|--------------------------|------------------------------------|--------------------------|--------------|
| <i>Escherichia coli</i>                 | 3,140                          | 8,209         | 2,705                    | 1,456                              | 1,873                    | 17,383       |
| <i>Klebsiella pneumoniae</i>            | 2,538                          | 6,734         | 2,128                    | 1,251                              | 1,429                    | 14,080       |
| <i>Klebsiella oxytoca</i>               | 432                            | 1,544         | 393                      | 214                                | 351                      | 2,934        |
| <i>Enterobacter</i> spp.                | 1,088                          | 2,888         | 854                      | 467                                | 675                      | 5,972        |
| <i>Enterobacter cloacae</i>             | 525                            | 1,696         | 512                      | 263                                | 340                      | 3,336        |
| <i>Enterobacter aerogenes</i>           | 439                            | 975           | 272                      | 166                                | 271                      | 2,123        |
| <i>Enterobacter asburiae</i>            | 89                             | 142           | 48                       | 26                                 | 41                       | 346          |
| <i>Enterobacter kobei</i>               | 29                             | 54            | 18                       | 12                                 | 19                       | 132          |
| <i>Enterobacter ludwigii</i>            | 6                              | 19            | 4                        |                                    | 4                        | 33           |
| <i>Enterobacter cancerogenus</i>        |                                | 1             |                          |                                    |                          | 1            |
| <i>Enterobacter hormaechi</i>           |                                | 1             |                          |                                    |                          | 1            |
| <i>Citrobacter</i> spp.                 | 558                            | 1,364         | 394                      | 221                                | 339                      | 2,876        |
| <i>Citrobacter freundii</i>             | 274                            | 746           | 274                      | 80                                 | 184                      | 1,558        |
| <i>Citrobacter koseri</i>               | 246                            | 487           | 95                       | 136                                | 120                      | 1,084        |
| <i>Citrobacter braakii</i>              | 23                             | 92            | 19                       | 1                                  | 24                       | 159          |
| <i>Citrobacter amalonaticus</i>         | 10                             | 16            | 5                        | 1                                  | 7                        | 39           |
| <i>Citrobacter farmeri</i>              | 3                              | 5             | 1                        | 1                                  | 3                        | 13           |
| <i>Citrobacter sedlakii</i>             | 1                              | 7             |                          | 2                                  | 1                        | 11           |
| <i>Citrobacter murlinae</i>             |                                | 5             |                          |                                    |                          | 5            |
| <i>Citrobacter</i> , species<br>unknown | 1                              | 3             |                          |                                    |                          | 4            |
| <i>Citrobacter diversus</i>             |                                | 1             |                          |                                    |                          | 1            |
| <i>Citrobacter gillenii</i>             |                                | 1             |                          |                                    |                          | 1            |
| <i>Citrobacter youngae</i>              |                                | 1             |                          |                                    |                          | 1            |
| Proteaceae                              | 1,190                          | 3,404         | 939                      | 537                                | 692                      | 6,762        |
| <i>Proteus mirabilis</i>                | 566                            | 1,597         | 496                      | 276                                | 348                      | 3,283        |
| <i>Proteus vulgaris</i>                 | 274                            | 834           | 152                      | 95                                 | 144                      | 1,499        |
| <i>Morganella morganii</i>              | 253                            | 704           | 213                      | 120                                | 133                      | 1,423        |
| <i>Providencia stuartii</i>             | 31                             | 125           | 34                       | 27                                 | 45                       | 262          |
| <i>Providencia rettgeri</i>             | 50                             | 101           | 29                       | 12                                 | 16                       | 208          |
| <i>Proteus penneri</i>                  | 14                             | 28            | 13                       | 6                                  | 5                        | 66           |
| <i>Providencia alcalifaciens</i>        | 2                              | 12            | 2                        | 1                                  | 1                        | 18           |
| <i>Proteus hauseri</i>                  |                                | 3             |                          |                                    |                          | 3            |
| Other <i>Enterobacteriaceae</i>         | 203                            | 683           | 252                      | 86                                 | 121                      | 1,345        |
| <i>Serratia marcescens</i>              | 181                            | 585           | 206                      | 80                                 | 103                      | 1,155        |
| <i>Raoultella ornithinolytica</i>       | 12                             | 49            | 33                       | 2                                  | 13                       | 109          |
| <i>Raoultella planticola</i>            | 2                              | 18            | 1                        | 1                                  | 4                        | 26           |

| <b>Organism</b>                | <b>Asia/<br/>South Pacific</b> | <b>Europe</b> | <b>Latin<br/>America</b> | <b>Middle<br/>East/ Africa</b> | <b>North<br/>America</b> | <b>Total</b>  |
|--------------------------------|--------------------------------|---------------|--------------------------|--------------------------------|--------------------------|---------------|
| <i>Serratia liquefaciens</i>   | 5                              | 11            | 2                        |                                | 1                        | 19            |
| <i>Klebsiella variicola</i>    |                                | 5             | 1                        | 1                              |                          | 7             |
| <i>Serratia ureilytica</i>     |                                | 4             | 3                        |                                |                          | 7             |
| <i>Hafnia alvei</i>            |                                | 4             |                          |                                |                          | 4             |
| <i>Pluralibacter gergoviae</i> |                                | 1             | 2                        | 1                              |                          | 4             |
| <i>Escherichia hermanii</i>    |                                | 1             |                          | 1                              |                          | 2             |
| <i>Kluyvera ascorbata</i>      | 1                              |               | 1                        |                                |                          | 2             |
| <i>Pantoea agglomerans</i>     |                                | 1             | 1                        |                                |                          | 2             |
| <i>Raoultella terrigena</i>    |                                | 2             |                          |                                |                          | 2             |
| <i>Escherichia fergusonii</i>  |                                | 1             |                          |                                |                          | 1             |
| <i>Escherichia vulneris</i>    |                                |               | 1                        |                                |                          | 1             |
| <i>Klebsiella ozaenae</i>      | 1                              |               |                          |                                |                          | 1             |
| <i>Lelliottia amnigenus</i>    |                                |               | 1                        |                                |                          | 1             |
| <i>Serratia odorifera</i>      |                                | 1             |                          |                                |                          | 1             |
| <i>Serratia rubidaea</i>       | 1                              |               |                          |                                |                          | 1             |
| <b>Total</b>                   | <b>9,149</b>                   | <b>24,826</b> | <b>7,665</b>             | <b>4,232</b>                   | <b>5,480</b>             | <b>51,352</b> |

4  
5
